# Supplementary material for: Allithiamine Exerts Therapeutic Effects on Sepsis by Modulating Metabolic Flux during Dendritic Cell Activation
Source: PubMed Central journal article supplement — Mol Cells. 2020 Nov 20;43(11):964–73. doi: 10.14348/molcells.2020.0198 (PMC7700841; doi:10.14348/molcells.2020.0198), 2020-11-20
Supplement: molce-43-964_Supple.pdf [file molce-43-964_Supple.pdf]

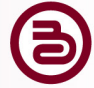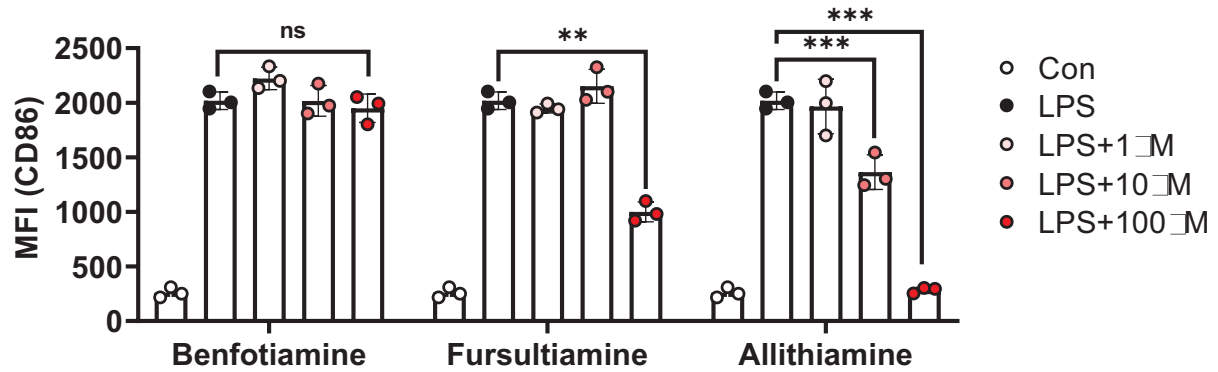

**Supplementary Fig. S1. Inhibitory effect of thiamine derivatives on LPS-induced dendritic cell activation.** BMDCs ( $1 \times 10^6$ ) were treated with thiamine derivatives and were stimulated with LPS. 16 h after treatment, CD86 on DCs were measured using flow cytometry. The scatter plot with bar graphs illustrates the mean fluorescence intensity (MFI) of the surface marker.  $**P < 0.01$ ;  $***P < 0.001$ ; ns, not significant.

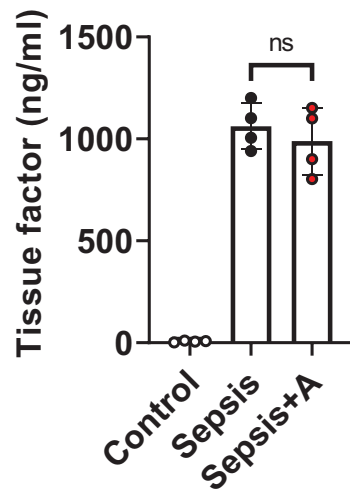

**Supplementary Fig. S2. Allithiamine does not alter tissue factor during sepsis.** Mice were challenged with 50 mg/kg LPS, followed by 5 mg/kg allithiamine. 12 h after the treatment, serum concentrations of tissue factor was determined using ELISA. Data represent the mean  $\pm$  SEM of three independent experiments. ns, not significant.

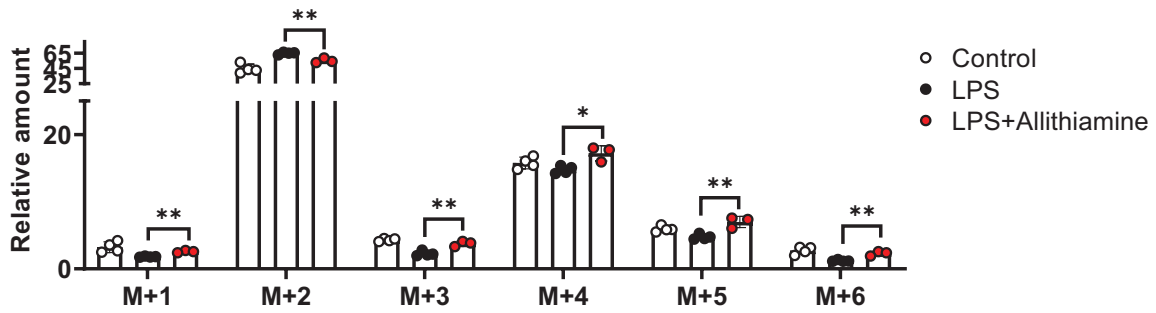

**Supplementary Fig. S3. Allithiamine facilitates glucose oxidation via TCA cycle in dendritic cell.** Allithiamine effect on the relative amounts of  $^{13}\text{C}$  labeled glucose in TCA cycle intermediates;  $n = 3$  to 4 per group. Asterisk indicates significant differences  $*P < 0.05$  and  $**P < 0.01$  from data obtained during the LPS only challenge. The values represent mean  $\pm$  SEM from three independent experiments performed in triplicate.
